# Supplementary material for: Systemic Severity and Organ Dysfunction in Subarachnoid Hemorrhage: A Large Retrospective Multicenter Cohort Study
Source: Springer Nature journal article supplement (doi:10.1007/s12028-020-01139-3), 2020-11-04
Supplement: 12028_2020_1139_MOESM1_ESM.pdf [file 12028_2020_1139_MOESM1_ESM.pdf]

## Supplemental Materials

### Supplemental figures:

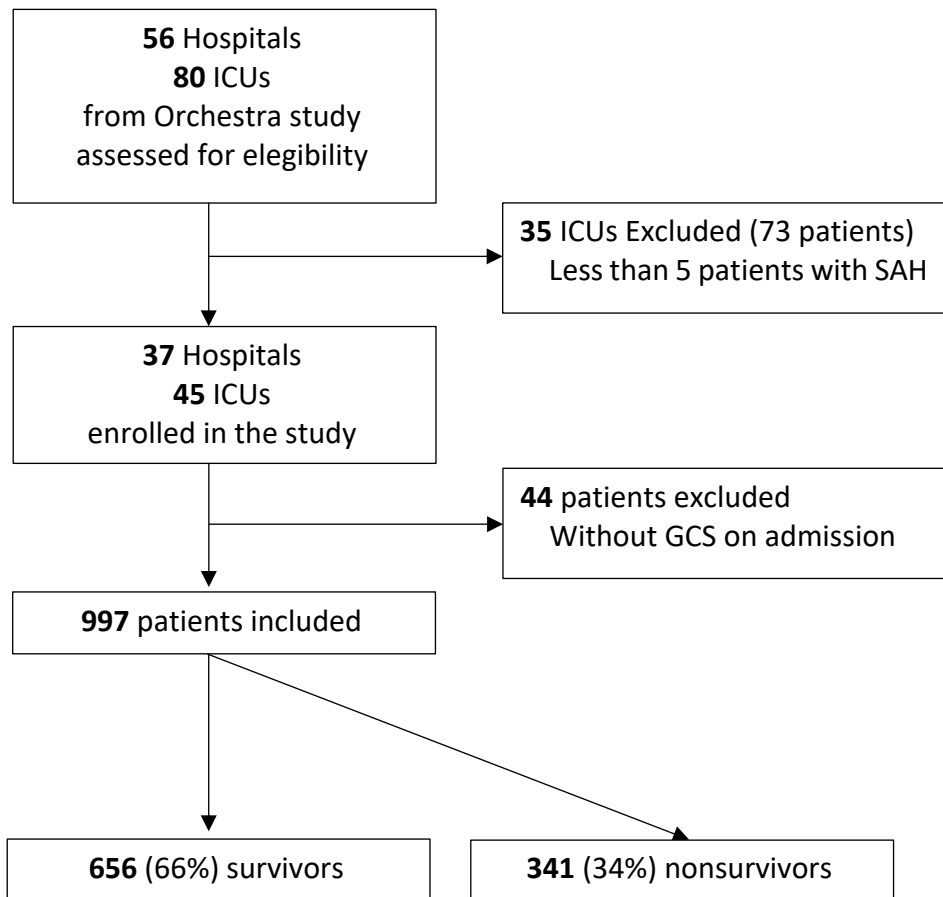

**Supplemental Figure I.** Study Flow Diagram

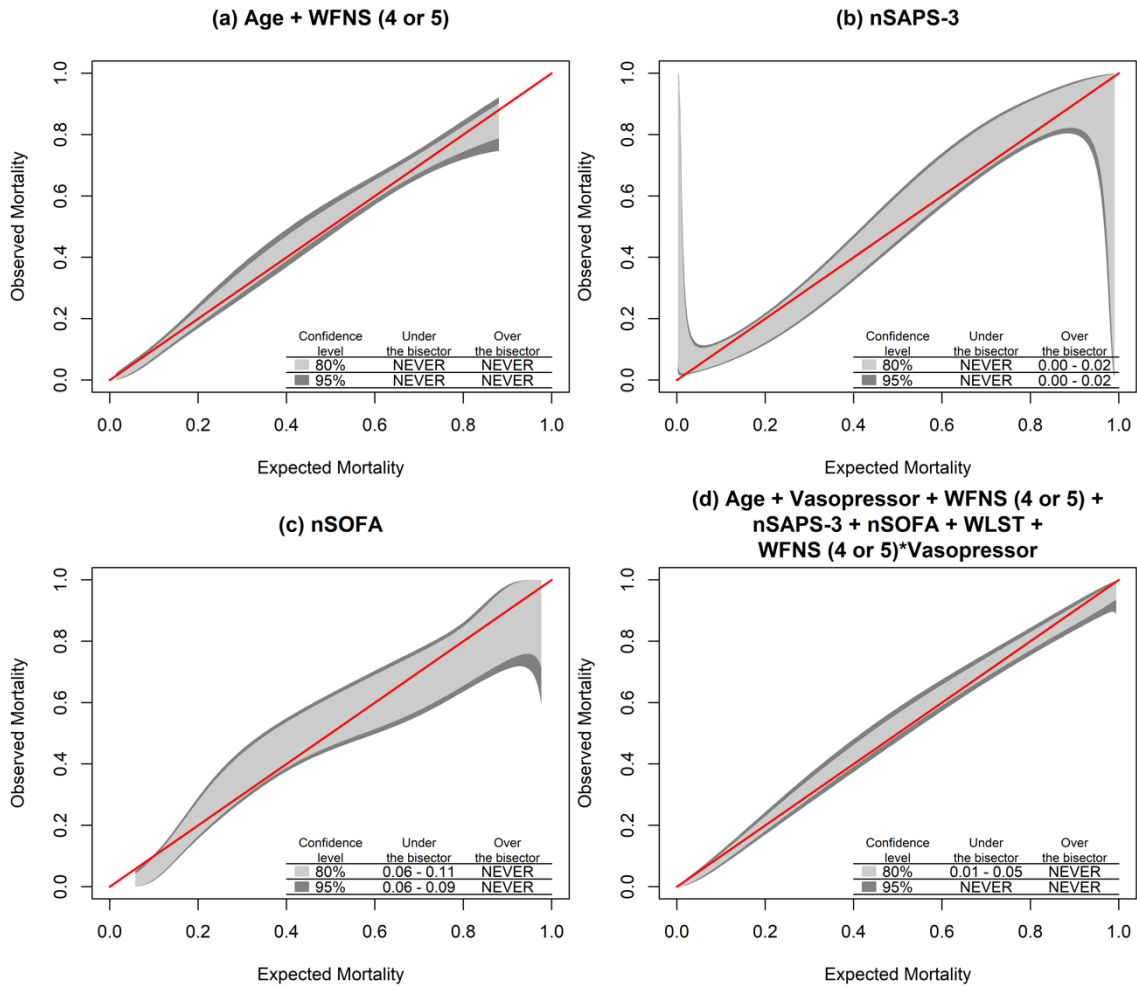

**Supplemental Figure II.** Calibration belts for Age and WFNS, nSAPS-3, nSOFA and the final multivariable model, described as bisector deviation intervals, as proposed by GiViTI, (Italian Group for the Evaluation of Intervention in Intensive Care Medicine). The times the calibration belt significantly deviates from the bisector using 80 and 95% confidence levels are described in the lower right part of the plots.

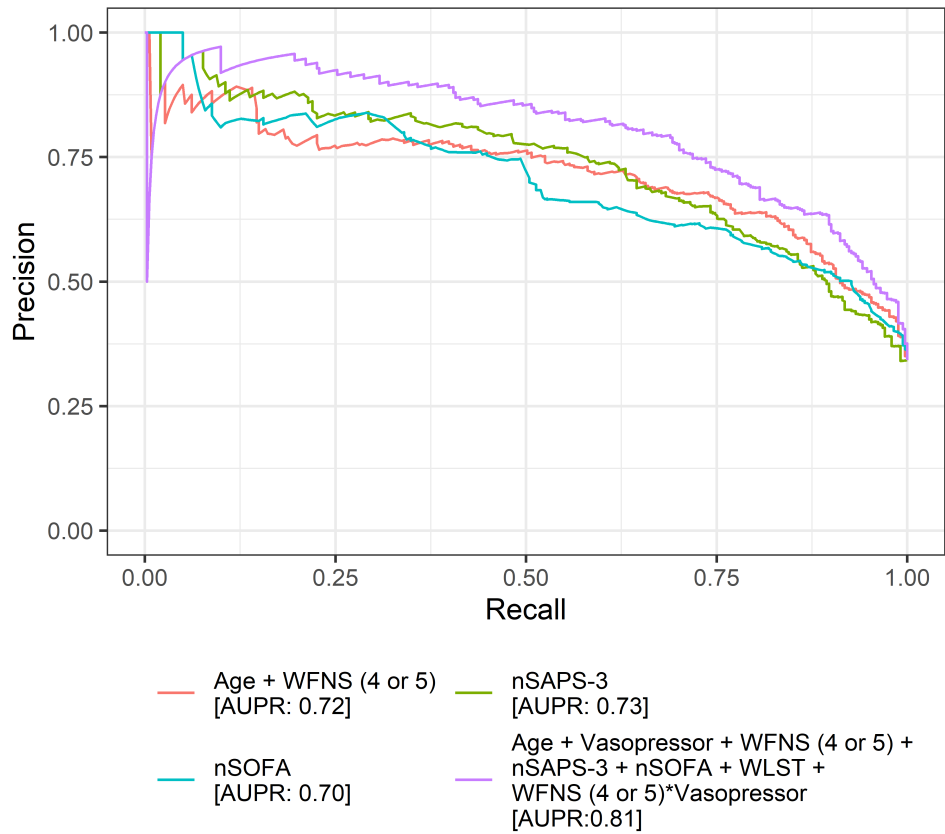

**Supplemental Figure III.** Precision-Recall Curves (PRC) of nSAPS-3 (green line; Area Under the PR Curve [AUPRC]: 0.73), nSOFA (blue line; AUPRC: 0.7), Age and WFNS 4 or 5 (red line; AUPRC: 0.72) and for the final multivariate model (purple line; AUPRC: 0.78).

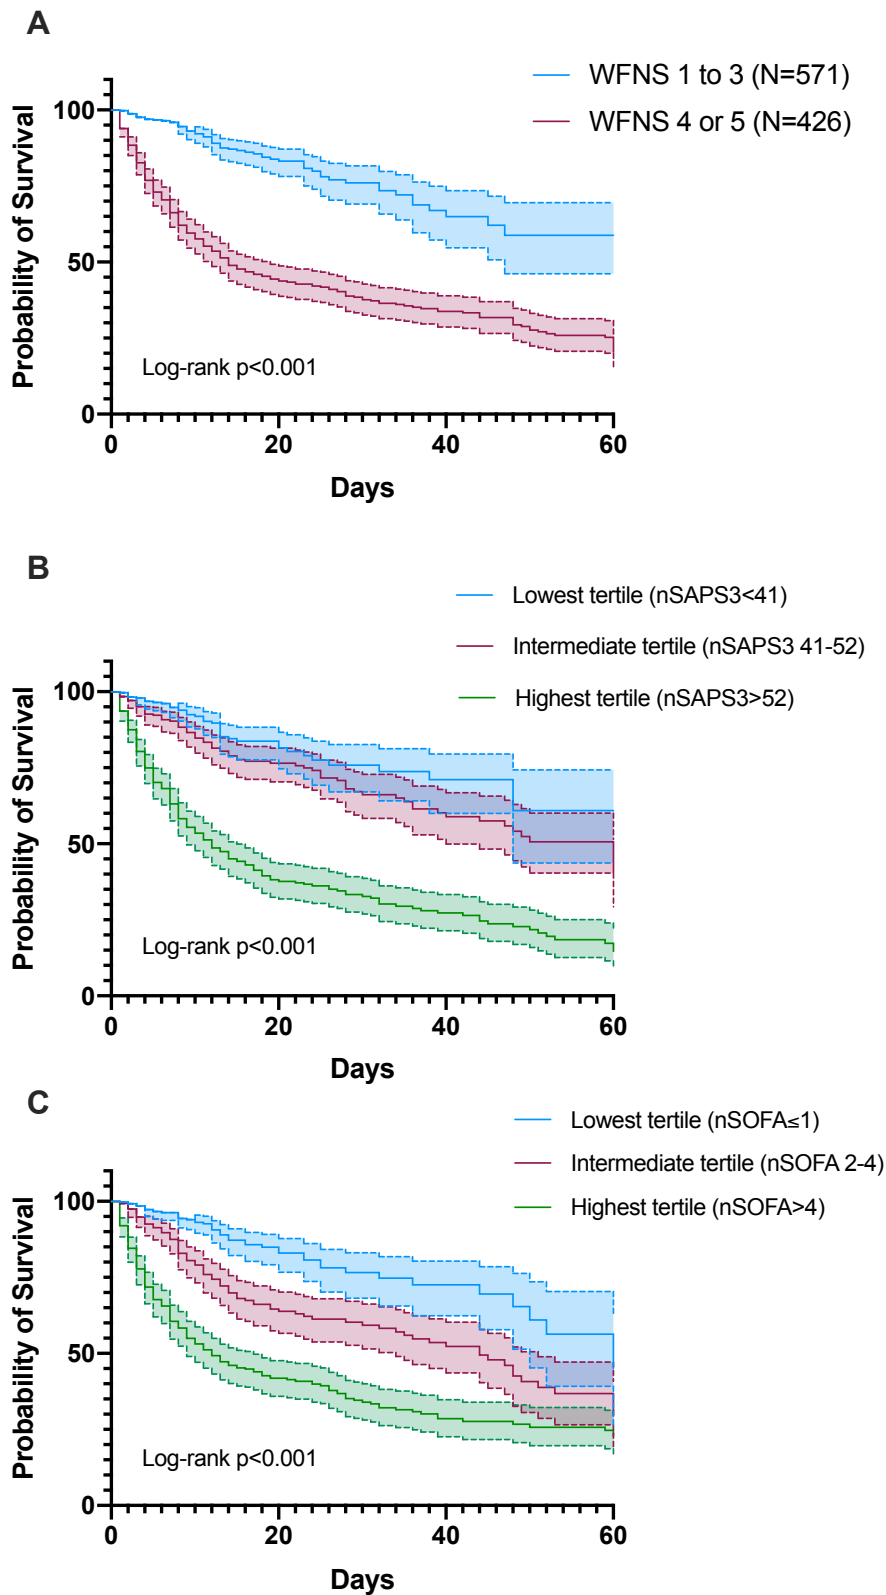

**Supplemental Figure IV.** Kaplan-Meier curves of survival probability according to World Federation of Neurological Surgeons scale (Panel A, Poor Grade vs Good Grade), tertiles of nSAPS 3 (Panel B) and tertiles of nSOFA (Panel C).

## Supplemental Tables

**Supplemental Table I.** Analysis of multicollinearity evaluation in final model

| Variables   | Tolerance | Variance Inflation Factor |
|-------------|-----------|---------------------------|
| Age         | 0.7369222 | 1.356995                  |
| Poor Grade  | 0.6429384 | 1.555359                  |
| nSAPS3      | 0.4620027 | 2.164489                  |
| nSOFA       | 0.4628262 | 2.160638                  |
| Vasopressor | 0.7193929 | 1.390061                  |
| WLST        | 0.9554448 | 1.046633                  |

Table legend: WLST, withdrawal or withhold of life sustaining therapy

**Supplemental Table II.** Comparisons of performance indices of multivariate mixed models

| Model                           | Description                                               | BIC    | RMSE | Performance |
|---------------------------------|-----------------------------------------------------------|--------|------|-------------|
| Final model                     | 6 Individual-level variables with significant interaction | 883.36 | 0.89 | 100%        |
| MV model 1                      | 5 Individual-level variables with significant interaction | 896.84 | 0.90 | 100%        |
| MV model 2                      | Individual-level without interactions                     | 896.89 | 0.90 | 65.39%      |
| MV model 3 (Neuro ICU)          | Individual- and group-level                               | 899.88 | 0.90 | 51.96%      |
| MV model 4 (High Volume Center) | Individual- and group-level                               | 903.30 | 0.90 | 29.68%      |

Table legend: BIC, Bayesian information criterion; RMSE, root mean square error; MV, multivariate; Neuro ICU, specialized neurological ICU; High Volume Center, hospitals with more than 40 patients with SAH during study period

Final model: In-hospital death ~ Age + Poor Grade + nSAPS3 + nSOFA + Vasopressor + WLST + Poor Grade:Vasopressor (1 | Hospital)

MV model 1: In-hospital death ~ Age + Poor Grade + nSAPS3 + nSOFA + Vasopressor + Poor Grade:Vasopressor (1 | Hospital)

MV model 2: In-hospital death ~ Age + Poor Grade + nSAPS3 + nSOFA + Vasopressor + (1 | Hospital)

MV model 3: In-hospital death ~ Age + Poor Grade + nSAPS3 + nSOFA + Vasopressor + Neuro ICU + (1 | Hospital)

MV model 4: In-hospital death ~ Age + Poor Grade + nSAPS3 + nSOFA + Vasopressor + High Volume Center + (1 | Hospital)

These model syntaxes mean that in-hospital death was to be predicted for several fixed effects (outside parenthesis), interaction terms (separated by “:”) and one random effect, which was a random intercept for the Hospital.
